# Supplementary material for: The relationship between functional movement patterns, dynamic balance and ice speed and agility in young elite male ice hockey players
Source: PeerJ. 2024 Oct 11;12:e18092. doi: 10.7717/peerj.18092 (PMC11472790; doi:10.7717/peerj.18092)
Supplement: Supplemental Information 1 [file peerj-12-18092-s001.xlsx]

## Sheet: data
Age	body mass [kg]	body height [cm]	Deep squat	Hurdle step	in-line lunge	schoulder mobility	Active leg rise up	stability	rotational stability	Total FMS points	Asymmetries	difference between anterior R and L	difference between posterolateral R and L	difference between posteromedial R and L	Normalized composite YBT R	Normalized Composite YBT L	differencees between composite YBT R and L	Normalized score [% leg length] Anterior R	Normalized score [% leg length] Anterior L	Normalized score [% leg length] Posterolateral R	Normalized score [% leg length] Posterolateral L	Normalized score [% leg length] Posteromedial R	Normalized score [% leg length] Posteromedial L	Time 5m Forward	Time 15m Forward	Time 30m Forward	Time 5m Backward	Time 15m Backward	Time 30m Backward	Agility	FULL SPEED
14.2	83	182	2	2	2	2	2	3	1	14	1	3	2	7	99.96	102.96	3	63.2653	59.596	133.673	134.343	115.306	121.212	1.2	3.88	4.99	1.77	3.65	4.97	14.88	15.39
14.3	72	176	2	2	2	2	2	2	2	14	1	1	0	0	88.0467	87.7333	0.313333	58.5106	57.4468	128.723	128.723	111.702	111.702	1.04	2.53	4.42	1.17	2.58	5.04	12.73	16.056
14.4	85	180	1	1	2	2	1	2	1	10	2	5	2	9	95.0667	99.43	4.36333	77.1739	83.0601	134.783	137.705	125	135.519	1.05	2.54	4.51	1.82	2.91	4.97	13.04	14.43
14.6	88	190	3	2	1	1	1	3	2	13	1	3	6	8	114.673	107.78	6.89333	52.4272	50	144.66	140.196	127.184	120.588	1.09	2.77	3.18	1.56	2.28	5.07	14.08	14.88
15	75	180	3	3	3	2	3	3	2	19	1	5	5	0	92.6316	96.1404	3.50877	54.7368	61.0526	102.105	107.368	121.053	121.053	1.071	3.253	4.324	1.159	3.81	4.969	14.987	15.856
15	85	184	2	3	2	3	3	2	2	17	1	10	6	1	99.3399	99.3333	0.00660066	74.2574	62	117.822	125	105.941	108	1.801	2.624	4.425	2.395	3.08	5.475	14.62	15.286
15	77	193	1	2	2	2	1	2	1	11	3	4	3	1	96.4744	98.0952	1.62088	49.0385	59.0476	123.077	124.762	117.308	117.143	1.034	3.419	4.453	2.09	3.256	5.346	14.154	14.671
15	80	181	2	1	1	2	2	2	1	11	3	6	6	9	125.641	118.75	6.89103	48.7179	58.75	152.564	141.25	175.641	160	0.995	3.471	4.466	1.437	4.652	6.089	15.304	16.519
15	85	178	3	2	2	2	2	2	2	15	2	6	5	2	101.099	103.261	2.16197	53.8462	60.8696	118.681	122.826	130.769	127.174	1.088	3.265	4.353	1.211	4.907	6.118	15.573	16.072
15	80	177	2	3	3	2	2	2	2	16	0	1	1	1	106.81	107.885	1.07527	51.6129	56.9892	132.258	133.333	136.559	137.634	1.015	3.191	4.206	1.071	3.634	4.705	15.016	14.916
15	88	188	2	1	2	2	2	2	2	13	2	5	7	4	93.0693	90.429	2.64026	56.4356	55.4455	123.762	116.832	99.0099	102.97	1.025	3.203	4.228	1.174	3.777	4.951	14.729	15.591
15	83	195	2	2	2	2	1	3	2	14	1	1	4	11	91.7431	96.6361	4.89297	48.6239	53.211	111.927	115.596	114.679	124.771	0.978	3.172	4.15	1.123	3.804	4.927	14.546	15.42
15	73	179	2	1	3	3	2	3	1	15	1	3	1	12	95.0667	99.9733	4.90667	63.0435	66.3043	144.565	145.652	129.348	142.391	1.19	2.67	4.5	1.22	2.71	4.94	13.9	16.88
15	82	180	1	1	2	1	1	2	1	9	3	2.5	2	1	102.455	102.61	0.155	59.6774	56.9892	150.538	152.688	145.161	146.237	0.77	2.37	3.97	1.17	2.87	5.22	13.44	16.34
15	78	182	2	2	2	2	2	3	1	14	1	3	8	2	98.8	95.5667	3.23333	60	63.8298	143.158	136.17	125.263	124.468	0.91	2.44	3.67	1.73	2.25	4.37	13.74	15.21
15.1	84	186	2	2	1	3	2	2	2	14	0	1	5	5	99.0533	98.7467	0.306667	64.1304	63.0435	154.348	148.913	132.609	138.043	1.08	2.87	4.11	1.47	3.33	4.97	14.05	15.88
15.2	81	186	2	1	2	3	1	2	1	12	3	3	8	4	101.527	106.925	5.39833	64.9485	67.6923	135.052	142.564	123.711	127.179	1.19	2.71	4.55	2.01	2.99	4.99	12.81	15.58
15.3	78	178	2	2	2	1	1	2	1	11	1	3	7	6	120.05	117.52	2.53	65.7143	63.4615	139.048	133.654	121.905	128.846	0.76	2.23	3.48	1.034	2.44	4.56	12.56	14.01
15.4	83	184	2	2	2	3	1	2	1	13	1	2	7	1	105.28	108.48	3.2	50	52.0833	148.958	156.25	143.75	144.792	0.89	2.44	3.97	1.18	2.28	5.1	13.58	14.55
15.5	80	177	2	1	2	2	2	2	2	13	3	4	11	6	112.1	116.217	4.11667	77.8947	73.6842	144.211	155.789	150.526	156.842	1.06	2.88	4.78	1.1	2.75	4.41	13.25	15.37
15.5	79	176	1	2	1	2	2	2	1	11	0	1	7	5	79.46	79.75	0.29	59.7701	58.6207	131.034	139.08	124.138	118.391	1.03	3.98	4.87	1.55	3.89	5.13	14.79	16.08
15.8	84	187	1	1	1	3	1	2	1	10	3	6	1	2.5	110.58	113.588	3.0075	57.732	63.5897	154.639	152.821	140.206	142.051	0.99	2.57	3.87	1.7	3.75	5.01	13.88	15.34
15.9	74	170	2	2	3	2	2	2	2	15	1	1	13	4	87.9667	92.82	4.85333	65.9341	64.8352	130.769	145.055	121.978	126.374	1.05	2.49	4.32	1.13	2.8	4.9	12.75	15.16
16	79	183	2	3	1	3	3	3	2	17	0	2	5	7	97.619	101.02	3.40136	60.2041	68.3673	122.449	127.551	110.204	117.347	1.767	2.529	4.296	2.303	3.017	5.32	14.719	14.927
16	85	185	2	3	2	3	2	3	2	17	0	4	7	2	107.719	102.083	1.62088	69.4737	67.7083	133.684	125	120	116.667	1.721	2.457	4.178	2.195	2.986	5.181	14.838	14.599
16	75	176	2	2	1	2	2	3	2	14	2	11	4	5	104.348	109.158	4.80968	45.6522	49.4505	127.174	132.967	140.217	136.264	1.765	2.915	4.68	2.28	2.882	5.162	12.75	14.308
16	74	182	2	2	2	2	2	2	2	14	0	0	7	2	109.375	106.529	2.84579	62.5	67.0103	142.708	134.021	122.917	123.711	0.996	3.176	4.172	1.167	4.058	5.225	14.882	16.551
16	74	187	2	2	2	3	2	2	1	14	0	4	10	3	87.2549	91.9094	4.65448	54.902	60.1942	104.902	113.592	101.961	103.883	1.794	2.521	4.315	2.349	3.072	5.421	14.498	15.076
16	77	190	1	2	2	2	2	2	1	12	2	8	15	15	99.3266	107.823	8.49653	55.5556	63.2653	126.263	142.857	116.162	132.653	1.115	3.259	4.374	2.798	2.494	5.202	14.715	14.234
16	79	178	2	2	1	2	2	2	2	13	2	3	6	11	100.725	109.158	8.43287	52.1739	51.6484	126.087	134.066	123.913	137.363	1.791	2.523	4.314	2.129	2.944	5.073	14.385	14.791
16	70	170	2	1	1	2	2	2	2	12	2	2	6	19	88.7755	82.8283	5.94723	50	46.4646	109.184	114.141	107.143	86.8687	1.916	2.491	4.407	2.76	2.31	5.07	15.5	14.31
16	82	183	3	2	2	3	2	2	2	16	1	1	8	0	95.9184	97.3064	1.38803	59.1837	67.6768	113.265	120.202	115.306	114.141	1.722	2.479	4.201	2.164	3.142	5.306	14.389	14.415
16	72	184	2	2	2	3	2	2	1	14	1	8	8	8	100.667	97.0297	3.63696	57	50.495	127	117.822	118	124.752	1.748	2.496	4.244	2.291	3.252	5.543	15.08	15.17
16	73	182	2	2	2	2	2	2	2	14	2	0	1	5	100	102.509	2.50896	51.0638	61.2903	124.468	124.731	124.468	131.183	0.91	3.15	4.06	2.149	2.99	5.139	13.31	14.289
16	79	184	2	2	2	2	2	2	2	14	1	7	1	3	97.5694	101.389	3.81944	47.9167	53.125	128.125	129.167	116.667	119.792	1.854	2.367	4.221	1.922	2.392	4.314	15.023	16.289
16	82	180	2	3	2	2	3	3	2	17	2	0	4	2	95.4861	98.5965	3.11038	47.9167	49.4737	115.625	121.053	122.917	126.316	1.039	3.137	4.176	1.152	3.746	4.898	15.043	16.437
16	78	170	2	1	2	3	3	2	2	15	2	1	1	2	112.821	111.392	1.42811	57.6923	50.6329	141.026	140.506	139.744	135.443	1.755	2.501	4.256	2.155	3.032	5.187	15.155	15.079
16	79	177	2	2	2	3	2	2	2	15	0	7	9	8	98.0159	88.4921	9.52381	48.8095	39.2857	116.667	105.952	128.571	119.048	1.762	2.567	4.329	2.445	3.166	5.611	15.525	15.654
16	60	170	2	2	2	2	2	2	2	14	1	8	4	10	89.4389	83.9869	5.45202	47.5248	39.2157	108.911	111.765	111.881	100.98	1.687	2.34	4.027	2.141	2.897	5.038	13.849	14.311
16	84	182	2	3	3	3	2	3	2	18	0	0	1	0	120.833	120.486	0.347222	71.875	76.0417	153.125	152.083	137.5	137.5	0.953	3.409	4.362	1.247	4.298	5.545	15.86	16.551
16	73	180	3	3	3	3	3	2	2	19	0	1	20	3	98.2639	90.8772	7.3867	42.7083	45.2632	125	105.263	127.083	125.263	1.037	3.31	4.347	1.227	4.101	5.328	14.846	15.728
16	79	179	1	1	1	1	2	2	1	9	3	8	8	7	95.8763	86.1953	9.681	49.4845	38.3838	111.34	101.01	126.804	117.172	1.101	3.339	4.44	1.272	3.972	5.244	15.618	16.191
16	87	185	2	2	2	2	2	2	1	13	1	4	1	7	92.5926	88.3333	4.25926	49.4949	47	109.091	109	119.192	111	1.067	3.365	4.432	1.207	3.979	5.186	14.717	16.223
16	76	177	2	1	2	3	1	2	1	12	2	1	3	1	98.7467	99.6667	0.92	78.2609	77.1739	144.565	147.826	127.174	128.261	1.28	2.94	4.9	1.57	3.71	4.87	14.03	17.02
16.5	86	195	2	2	2	2	2	1	1	12	2	1	5	2	82.65	83.23	0.58	54.023	52.8736	145.977	151.724	127.586	125.287	0.88	2.66	3.99	1.99	2.38	4.77	13.89	15.06
17	84.7	185	3	2	2	3	2	3	2	17	0	12	7	10	86.1386	82	4.13861	41.5842	33	101.98	110	114.851	106	1.761	2.581	4.342	2.36	3.467	5.827	15.111	15.624
17	79	185	2	3	2	2	2	2	2	15	2	9	7	0	97.3333	97.6431	0.309764	69	70.7071	110	118.182	113	114.141	1.699	2.411	4.11	2.052	2.886	4.938	13.684	14.144
17	80	180	2	3	2	3	2	3	2	17	1	1	11	1	104.912	110.638	5.72602	56.8421	60.6383	125.263	138.298	132.632	135.106	1.744	2.435	4.179	2.397	3.211	5.608	14.169	14.62
17	72	182	2	2	2	3	3	3	1	16	1	2	2	0	102.02	103.061	1.04102	60.6061	64.2857	132.323	135.714	113.131	114.286	1.777	2.491	4.268	2.069	2.871	4.94	13.813	14.186
17	85	185	1	2	2	3	2	3	2	15	1	9	8	4	106.463	112.458	5.99533	61.2245	70.7071	122.449	129.293	135.714	138.384	1.656	2.393	4.049	1.979	2.738	4.717	13.743	14.071
17	93	190	3	2	1	2	2	2	2	14	1	7	13	15	104.207	93.7908	10.4163	69.9029	59.8039	126.214	114.706	116.505	102.941	1.89	3.8	5.69	2.88	2.734	5.61	18.9	16.015
17	87.9	186	2	2	2	3	3	3	2	17	1	7	1	6	115.182	116.333	1.15182	47.5248	56	149.505	150	148.515	144	1.819	2.537	4.356	2.31	3.135	5.445	14.588	15.028
17	83	170	1	2	1	2	2	2	1	11	3	8	9	3	117.84	114.352	3.48852	56.338	41.6667	143.662	129.167	153.521	147.222	1.669	2.393	4.062	2.145	2.952	5.097	13.61	14.273
17	77	180	2	1	1	2	2	2	1	11	2	2	4	6	112.734	110	2.73408	65.1685	57.7778	141.573	144.444	131.461	123.333	1.957	2.475	4.432	2.132	2.89	5.022	14.612	14.444
17	80	188	2	2	2	2	2	3	2	15	0	2	8	8	98.2818	91.5825	6.6993	56.701	54.5455	115.464	105.051	122.68	112.121	1.658	2.419	4.077	2.361	3.254	5.615	14.374	14.137
17	88	186	3	2	2	2	2	2	2	15	2	3	7	9	88.8889	88.3162	0.572738	45.8333	49.4845	107.292	113.402	113.542	103.093	1.733	2.401	4.134	2.261	3.043	5.304	14.927	14.819
17	84	181	2	2	2	2	2	2	2	14	0	3	11	2	89.5833	84.0278	5.55556	48.9583	46.875	106.25	94.7917	113.542	111.458	1.832	2.595	4.427	2.128	3.006	5.134	14.285	16.025
17	82	182	2	1	2	3	2	2	2	14	0	3	18	15	91.4089	90.4762	0.932744	45.3608	50	125.773	106.122	103.093	117.347	1.081	3.444	4.525	1.276	4.229	5.505	15.644	16.583
17	89	196	1	1	2	2	2	2	1	11	2	8	8	7	102.913	100	2.91262	61.165	48.5437	128.155	120.388	119.417	126.214	1.057	3.268	4.325	1.163	3.843	5.006	14.879	15.511
18	79.5	185	2	1	1	2	2	2	1	11	2	2	2	30	93.6027	82.9932	10.6095	41.4141	40.8163	121.212	120.408	118.182	88.7755	1.995	2.249	4.244	1.118	4.125	5.243	14.975	15.609
																								1.1525	2.588	4.3145	1.871	3.0575	5.115	14.567
