# Supplementary material for: The relationship between functional movement patterns, dynamic balance and ice speed and agility in young elite male ice hockey players
Source: PeerJ. 2024 Oct 11;12:e18092. doi: 10.7717/peerj.18092 (PMC11472790; doi:10.7717/peerj.18092)
Supplement: Supplemental Information 2 [file peerj-12-18092-s002.xlsx]

## Sheet: data
Age	body mass [kg]	body height [cm]	Deep squat	Hurdle step	in-line lunge	schoulder mobility	Active leg rise up	stability	rotational stability	Total FMS points	Asymmetries	difference between anterior R and L	difference between posterolateral R and L	difference between posteromedial R and L	Normalized composite YBT R	Normalized Composite YBT L	differencees between composite YBT R and L	Normalized score [% leg length] Anterior R	Normalized score [% leg length] Anterior L	Normalized score [% leg length] Posterolateral R	Normalized score [% leg length] Posterolateral L	Normalized score [% leg length] Posteromedial R	Normalized score [% leg length] Posteromedial L	Time 5m Forward	Time 15m Forward	Time 30m Forward	Time 5m Backward	Time 15m Backward	Time 30m Backward	Agility	FULL SPEED
14.2	83	182	2	2	2	2	2	3	1	14	1	3	2	7	99.96	102.96	3	63.2653	59.596	133.673	134.343	115.306	121.212	1.2	3.88	4.99	1.77	3.65	4.97	14.88	15.39
14.3	72	176	2	2	2	2	2	2	2	14	1	1	0	0	88.0467	87.7333	0.313333	58.5106	57.4468	128.723	128.723	111.702	111.702	1.04	2.53	4.42	1.17	2.58	5.04	12.73	16.056
14.4	85	180	1	1	2	2	1	2	1	10	2	5	2	9	95.0667	99.43	4.36333	77.1739	83.0601	134.783	137.705	125	135.519	1.05	2.54	4.51	1.82	2.91	4.97	13.04	14.43
14.6	88	190	3	2	1	1	1	3	2	13	1	3	6	8	114.673	107.78	6.89333	52.4272	50	144.66	140.196	127.184	120.588	1.09	2.77	3.18	1.56	2.28	5.07	14.08	14.88
15	75	180	3	3	3	2	3	3	2	19	1	5	5	0	92.6316	96.1404	3.50877	54.7368	61.0526	102.105	107.368	121.053	121.053	1.071	3.253	4.324	1.159	3.81	4.969	14.987	15.856
15	85	184	2	3	2	3	3	2	2	17	1	10	6	1	99.3399	99.3333	0.00660066	74.2574	62	117.822	125	105.941	108	1.801	2.624	4.425	2.395	3.08	5.475	14.62	15.286
15	77	193	1	2	2	2	1	2	1	11	3	4	3	1	96.4744	98.0952	1.62088	49.0385	59.0476	123.077	124.762	117.308	117.143	1.034	3.419	4.453	2.09	3.256	5.346	14.154	14.671
15	80	181	2	1	1	2	2	2	1	11	3	6	6	9	125.641	118.75	6.89103	48.7179	58.75	152.564	141.25	175.641	160	0.995	3.471	4.466	1.437	4.652	6.089	15.304	16.519
15	85	178	3	2	2	2	2	2	2	15	2	6	5	2	101.099	103.261	2.16197	53.8462	60.8696	118.681	122.826	130.769	127.174	1.088	3.265	4.353	1.211	4.907	6.118	15.573	16.072
15	80	177	2	3	3	2	2	2	2	16	0	1	1	1	106.81	107.885	1.07527	51.6129	56.9892	132.258	133.333	136.559	137.634	1.015	3.191	4.206	1.071	3.634	4.705	15.016	14.916
15	88	188	2	1	2	2	2	2	2	13	2	5	7	4	93.0693	90.429	2.64026	56.4356	55.4455	123.762	116.832	99.0099	102.97	1.025	3.203	4.228	1.174	3.777	4.951	14.729	15.591
15	83	195	2	2	2	2	1	3	2	14	1	1	4	11	91.7431	96.6361	4.89297	48.6239	53.211	111.927	115.596	114.679	124.771	0.978	3.172	4.15	1.123	3.804	4.927	14.546	15.42
15	73	179	2	1	3	3	2	3	1	15	1	3	1	12	95.0667	99.9733	4.90667	63.0435	66.3043	144.565	145.652	129.348	142.391	1.19	2.67	4.5	1.22	2.71	4.94	13.9	16.88
15	82	180	1	1	2	1	1	2	1	9	3	2.5	2	1	102.455	102.61	0.155	59.6774	56.9892	150.538	152.688	145.161	146.237	0.77	2.37	3.97	1.17	2.87	5.22	13.44	16.34
15	78	182	2	2	2	2	2	3	1	14	1	3	8	2	98.8	95.5667	3.23333	60	63.8298	143.158	136.17	125.263	124.468	0.91	2.44	3.67	1.73	2.25	4.37	13.74	15.21
15.1	84	186	2	2	1	3	2	2	2	14	0	1	5	5	99.0533	98.7467	0.306667	64.1304	63.0435	154.348	148.913	132.609	138.043	1.08	2.87	4.11	1.47	3.33	4.97	14.05	15.88
15.2	81	186	2	1	2	3	1	2	1	12	3	3	8	4	101.527	106.925	5.39833	64.9485	67.6923	135.052	142.564	123.711	127.179	1.19	2.71	4.55	2.01	2.99	4.99	12.81	15.58
15.3	78	178	2	2	2	1	1	2	1	11	1	3	7	6	120.05	117.52	2.53	65.7143	63.4615	139.048	133.654	121.905	128.846	0.76	2.23	3.48	1.034	2.44	4.56	12.56	14.01
15.4	83	184	2	2	2	3	1	2	1	13	1	2	7	1	105.28	108.48	3.2	50	52.0833	148.958	156.25	143.75	144.792	0.89	2.44	3.97	1.18	2.28	5.1	13.58	14.55
15.5	80	177	2	1	2	2	2	2	2	13	3	4	11	6	112.1	116.217	4.11667	77.8947	73.6842	144.211	155.789	150.526	156.842	1.06	2.88	4.78	1.1	2.75	4.41	13.25	15.37
15.5	79	176	1	2	1	2	2	2	1	11	0	1	7	5	79.46	79.75	0.29	59.7701	58.6207	131.034	139.08	124.138	118.391	1.03	3.98	4.87	1.55	3.89	5.13	14.79	16.08
15.8	84	187	1	1	1	3	1	2	1	10	3	6	1	2.5	110.58	113.588	3.0075	57.732	63.5897	154.639	152.821	140.206	142.051	0.99	2.57	3.87	1.7	3.75	5.01	13.88	15.34
15.9	74	170	2	2	3	2	2	2	2	15	1	1	13	4	87.9667	92.82	4.85333	65.9341	64.8352	130.769	145.055	121.978	126.374	1.05	2.49	4.32	1.13	2.8	4.9	12.75	15.16
16	79	183	2	3	1	3	3	3	2	17	0	2	5	7	97.619	101.02	3.40136	60.2041	68.3673	122.449	127.551	110.204	117.347	1.767	2.529	4.296	2.303	3.017	5.32	14.719	14.927
16	85	185	2	3	2	3	2	3	2	17	0	4	7	2	107.719	102.083	1.62088	69.4737	67.7083	133.684	125	120	116.667	1.721	2.457	4.178	2.195	2.986	5.181	14.838	14.599
16	75	176	2	2	1	2	2	3	2	14	2	11	4	5	104.348	109.158	4.80968	45.6522	49.4505	127.174	132.967	140.217	136.264	1.765	2.915	4.68	2.28	2.882	5.162	12.75	14.308
16	74	182	2	2	2	2	2	2	2	14	0	0	7	2	109.375	106.529	2.84579	62.5	67.0103	142.708	134.021	122.917	123.711	0.996	3.176	4.172	1.167	4.058	5.225	14.882	16.551
16	74	187	2	2	2	3	2	2	1	14	0	4	10	3	87.2549	91.9094	4.65448	54.902	60.1942	104.902	113.592	101.961	103.883	1.794	2.521	4.315	2.349	3.072	5.421	14.498	15.076
16	77	190	1	2	2	2	2	2	1	12	2	8	15	15	99.3266	107.823	8.49653	55.5556	63.2653	126.263	142.857	116.162	132.653	1.115	3.259	4.374	2.798	2.494	5.202	14.715	14.234
16	79	178	2	2	1	2	2	2	2	13	2	3	6	11	100.725	109.158	8.43287	52.1739	51.6484	126.087	134.066	123.913	137.363	1.791	2.523	4.314	2.129	2.944	5.073	14.385	14.791
16	70	170	2	1	1	2	2	2	2	12	2	2	6	19	88.7755	82.8283	5.94723	50	46.4646	109.184	114.141	107.143	86.8687	1.916	2.491	4.407	2.76	2.31	5.07	15.5	14.31
16	82	183	3	2	2	3	2	2	2	16	1	1	8	0	95.9184	97.3064	1.38803	59.1837	67.6768	113.265	120.202	115.306	114.141	1.722	2.479	4.201	2.164	3.142	5.306	14.389	14.415
16	72	184	2	2	2	3	2	2	1	14	1	8	8	8	100.667	97.0297	3.63696	57	50.495	127	117.822	118	124.752	1.748	2.496	4.244	2.291	3.252	5.543	15.08	15.17
16	73	182	2	2	2	2	2	2	2	14	2	0	1	5	100	102.509	2.50896	51.0638	61.2903	124.468	124.731	124.468	131.183	0.91	3.15	4.06	2.149	2.99	5.139	13.31	14.289
16	79	184	2	2	2	2	2	2	2	14	1	7	1	3	97.5694	101.389	3.81944	47.9167	53.125	128.125	129.167	116.667	119.792	1.854	2.367	4.221	1.922	2.392	4.314	15.023	16.289
16	82	180	2	3	2	2	3	3	2	17	2	0	4	2	95.4861	98.5965	3.11038	47.9167	49.4737	115.625	121.053	122.917	126.316	1.039	3.137	4.176	1.152	3.746	4.898	15.043	16.437
16	78	170	2	1	2	3	3	2	2	15	2	1	1	2	112.821	111.392	1.42811	57.6923	50.6329	141.026	140.506	139.744	135.443	1.755	2.501	4.256	2.155	3.032	5.187	15.155	15.079
16	79	177	2	2	2	3	2	2	2	15	0	7	9	8	98.0159	88.4921	9.52381	48.8095	39.2857	116.667	105.952	128.571	119.048	1.762	2.567	4.329	2.445	3.166	5.611	15.525	15.654
16	60	170	2	2	2	2	2	2	2	14	1	8	4	10	89.4389	83.9869	5.45202	47.5248	39.2157	108.911	111.765	111.881	100.98	1.687	2.34	4.027	2.141	2.897	5.038	13.849	14.311
16	84	182	2	3	3	3	2	3	2	18	0	0	1	0	120.833	120.486	0.347222	71.875	76.0417	153.125	152.083	137.5	137.5	0.953	3.409	4.362	1.247	4.298	5.545	15.86	16.551
16	73	180	3	3	3	3	3	2	2	19	0	1	20	3	98.2639	90.8772	7.3867	42.7083	45.2632	125	105.263	127.083	125.263	1.037	3.31	4.347	1.227	4.101	5.328	14.846	15.728
16	79	179	1	1	1	1	2	2	1	9	3	8	8	7	95.8763	86.1953	9.681	49.4845	38.3838	111.34	101.01	126.804	117.172	1.101	3.339	4.44	1.272	3.972	5.244	15.618	16.191
16	87	185	2	2	2	2	2	2	1	13	1	4	1	7	92.5926	88.3333	4.25926	49.4949	47	109.091	109	119.192	111	1.067	3.365	4.432	1.207	3.979	5.186	14.717	16.223
16	76	177	2	1	2	3	1	2	1	12	2	1	3	1	98.7467	99.6667	0.92	78.2609	77.1739	144.565	147.826	127.174	128.261	1.28	2.94	4.9	1.57	3.71	4.87	14.03	17.02
16.5	86	195	2	2	2	2	2	1	1	12	2	1	5	2	82.65	83.23	0.58	54.023	52.8736	145.977	151.724	127.586	125.287	0.88	2.66	3.99	1.99	2.38	4.77	13.89	15.06
17	84.7	185	3	2	2	3	2	3	2	17	0	12	7	10	86.1386	82	4.13861	41.5842	33	101.98	110	114.851	106	1.761	2.581	4.342	2.36	3.467	5.827	15.111	15.624
17	79	185	2	3	2	2	2	2	2	15	2	9	7	0	97.3333	97.6431	0.309764	69	70.7071	110	118.182	113	114.141	1.699	2.411	4.11	2.052	2.886	4.938	13.684	14.144
17	80	180	2	3	2	3	2	3	2	17	1	1	11	1	104.912	110.638	5.72602	56.8421	60.6383	125.263	138.298	132.632	135.106	1.744	2.435	4.179	2.397	3.211	5.608	14.169	14.62
17	72	182	2	2	2	3	3	3	1	16	1	2	2	0	102.02	103.061	1.04102	60.6061	64.2857	132.323	135.714	113.131	114.286	1.777	2.491	4.268	2.069	2.871	4.94	13.813	14.186
17	85	185	1	2	2	3	2	3	2	15	1	9	8	4	106.463	112.458	5.99533	61.2245	70.7071	122.449	129.293	135.714	138.384	1.656	2.393	4.049	1.979	2.738	4.717	13.743	14.071
17	93	190	3	2	1	2	2	2	2	14	1	7	13	15	104.207	93.7908	10.4163	69.9029	59.8039	126.214	114.706	116.505	102.941	1.89	3.8	5.69	2.88	2.734	5.61	18.9	16.015
17	87.9	186	2	2	2	3	3	3	2	17	1	7	1	6	115.182	116.333	1.15182	47.5248	56	149.505	150	148.515	144	1.819	2.537	4.356	2.31	3.135	5.445	14.588	15.028
17	83	170	1	2	1	2	2	2	1	11	3	8	9	3	117.84	114.352	3.48852	56.338	41.6667	143.662	129.167	153.521	147.222	1.669	2.393	4.062	2.145	2.952	5.097	13.61	14.273
17	77	180	2	1	1	2	2	2	1	11	2	2	4	6	112.734	110	2.73408	65.1685	57.7778	141.573	144.444	131.461	123.333	1.957	2.475	4.432	2.132	2.89	5.022	14.612	14.444
17	80	188	2	2	2	2	2	3	2	15	0	2	8	8	98.2818	91.5825	6.6993	56.701	54.5455	115.464	105.051	122.68	112.121	1.658	2.419	4.077	2.361	3.254	5.615	14.374	14.137
17	88	186	3	2	2	2	2	2	2	15	2	3	7	9	88.8889	88.3162	0.572738	45.8333	49.4845	107.292	113.402	113.542	103.093	1.733	2.401	4.134	2.261	3.043	5.304	14.927	14.819
17	84	181	2	2	2	2	2	2	2	14	0	3	11	2	89.5833	84.0278	5.55556	48.9583	46.875	106.25	94.7917	113.542	111.458	1.832	2.595	4.427	2.128	3.006	5.134	14.285	16.025
17	82	182	2	1	2	3	2	2	2	14	0	3	18	15	91.4089	90.4762	0.932744	45.3608	50	125.773	106.122	103.093	117.347	1.081	3.444	4.525	1.276	4.229	5.505	15.644	16.583
17	89	196	1	1	2	2	2	2	1	11	2	8	8	7	102.913	100	2.91262	61.165	48.5437	128.155	120.388	119.417	126.214	1.057	3.268	4.325	1.163	3.843	5.006	14.879	15.511
18	79.5	185	2	1	1	2	2	2	1	11	2	2	2	30	93.6027	82.9932	10.6095	41.4141	40.8163	121.212	120.408	118.182	88.7755	1.995	2.249	4.244	1.118	4.125	5.243	14.975	15.609
																								1.1525	2.588	4.3145	1.871	3.0575	5.115	14.567

## Sheet: Arkusz1
Time 30 m Forward
Variable	coef	std err	z	P>|z|	[0.025	0.975]
const	0.5879	2.526	0.233	0.816	-4.363	5.539
Deep squat	0.1065	0.765	0.139	0.889	-1.392	1.605
Hurdle step	-1.4855	0.772	-1.924	0.054	-2.999	0.028
in-line lunge	1.4111	0.858	1.644	0.1	-0.271	3.093
Asymmetries	-0.4612	0.487	-0.948	0.343	-1.415	0.492
difference between anterior R and L	0.72	0.399	1.806	0.071	-0.061	1.501
difference between posterolateral R and L	0.4366	0.407	1.072	0.284	-0.362	1.235
difference between posteromedial R and L	0.1919	0.483	0.398	0.691	-0.754	1.138
Normalized composite YBT R	-2.8829	2.435	-1.184	0.236	-7.654	1.889
Normalized Composite YBT L	2.3886	2.544	0.939	0.348	-2.598	7.375
differencees between composite YBT R and L	0.1086	0.468	0.232	0.817	-0.809	1.026
Normalized score [% leg length] Anterior R	0.9853	0.728	1.354	0.176	-0.441	2.412
Normalized score [% leg length] Anterior L	-0.0431	0.717	-0.06	0.952	-1.449	1.362
Normalized score [% leg length] Posterolateral R	0.5789	1.425	0.406	0.685	-2.213	3.371
Normalized score [% leg length] Posterolateral L	-1.0031	1.441	-0.696	0.486	-3.828	1.822
Normalized score [% leg length] Posteromedial R	2.3321	1.366	1.707	0.088	-0.345	5.01
Normalized score [% leg length] Posteromedial L	-1.8068	1.625	-1.112	0.266	-4.992	1.379
Time 15m Backward
Variable	coef	std err	z	P>|z|	[0.025	0.975]
const	-0.0111	0.289	-0.038	0.969	-0.577	0.555
Asymmetries	-0.4109	0.331	-1.24	0.215	-1.061	0.239
difference between anterior R and L	-0.0568	0.335	-0.17	0.865	-0.714	0.6
difference between posterolateral R and L	-0.1501	0.392	-0.383	0.702	-0.917	0.617
difference between posteromedial R and L	0.1281	0.432	0.297	0.767	-0.718	0.974
Normalized composite YBT R	0.1766	2.108	0.084	0.933	-3.956	4.309
Normalized Composite YBT L	-0.3389	2.268	-0.149	0.881	-4.784	4.106
differencees between composite YBT R and L	-0.4591	0.462	-0.993	0.321	-1.365	0.447
Normalized score [% leg length] Anterior R	-0.3875	0.644	-0.602	0.547	-1.649	0.874
Normalized score [% leg length] Anterior L	0.3402	0.645	0.527	0.598	-0.924	1.605
Normalized score [% leg length] Posterolateral R	0.3212	1.288	0.249	0.803	-2.203	2.845
Normalized score [% leg length] Posterolateral L	-1.2729	1.357	-0.938	0.348	-3.932	1.386
Normalized score [% leg length] Posteromedial R	0.4864	1.104	0.441	0.659	-1.677	2.65
Normalized score [% leg length] Posteromedial L	0.1886	1.302	0.145	0.885	-2.364	2.741
Full Speed
Variable	coef	std err	z	P>|z|	[0.025	0.975]
const	0.0066	0.29	0.023	0.982	-0.562	0.575
Asymmetries	0.0499	0.338	0.148	0.883	-0.613	0.713
difference between anterior R and L	0.0336	0.336	0.1	0.92	-0.626	0.693
difference between posterolateral R and L	-0.4535	0.37	-1.225	0.221	-1.179	0.272
difference between posteromedial R and L	0.1281	0.424	0.302	0.762	-0.702	0.958
Normalized composite YBT R	-1.1524	2.197	-0.525	0.6	-5.458	3.153
Normalized Composite YBT L	0.0803	2.362	0.034	0.973	-4.55	4.71
differencees between composite YBT R and L	0.1921	0.455	0.422	0.673	-0.7	1.084
Normalized score [% leg length] Anterior R	0.7726	0.656	1.178	0.239	-0.512	2.058
Normalized score [% leg length] Anterior L	-0.2857	0.677	-0.422	0.673	-1.613	1.041
Normalized score [% leg length] Posterolateral R	1.7198	1.269	1.355	0.175	-0.767	4.207
Normalized score [% leg length] Posterolateral L	-2.0977	1.358	-1.545	0.122	-4.759	0.564
Normalized score [% leg length] Posteromedial R	0.2912	1.177	0.248	0.805	-2.015	2.598
Normalized score [% leg length] Posteromedial L	0.5027	1.371	0.367	0.714	-2.185	3.19
Time 15 m Forward
Variable	coef	std err	z	P>|z|	[0.025	0.975]
const	-0.465206	0.520206	-0.894273	0.371176	-1.484791	0.554379
Asymmetries	0.357245	0.331645	1.077191	0.281395	-0.292768	1.007258
difference between anterior R and L	-0.227216	0.343091	-0.662262	0.507803	-0.899661	0.44523
difference between posterolateral R and L	0.076146	0.367113	0.207418	0.835684	-0.643382	0.795673
difference between posteromedial R and L	0.046656	0.44054	0.105906	0.915657	-0.816786	0.910098
Normalized composite YBT R	0.936861	2.044213	0.458299	0.646737	-3.069723	4.943445
Normalized Composite YBT L	-1.549267	2.214778	-0.699513	0.484231	-5.890153	2.791619
differencees between composite YBT R and L	-0.010556	0.449957	-0.02346	0.981284	-0.892455	0.871344
Normalized score [% leg length] Anterior R	-0.289328	0.615173	-0.470319	0.638127	-1.495045	0.916389
Normalized score [% leg length] Anterior L	0.517506	0.640583	0.807867	0.419167	-0.738014	1.773025
Normalized score [% leg length] Posterolateral R	0.34344	1.216893	0.282227	0.777769	-2.041626	2.728507
Normalized score [% leg length] Posterolateral L	-0.682817	1.24936	-0.546533	0.584699	-3.131519	1.765884
Normalized score [% leg length] Posteromedial R	-1.049652	1.051218	-0.99851	0.318032	-3.110001	1.010698
Normalized score [% leg length] Posteromedial L	1.785661	1.272983	1.402738	0.160695	-0.709339	4.280662
Time 5m Backward
Variable	Coef.	Std.Err.	z	P>|z|	[0.025	0.975]
const	4.456	3.738	1.192	0.233	-2.869	11.782
Deep squat	-0.93	0.902	-1.032	0.302	-2.697	0.837
Hurdle step	0.907	0.983	0.922	0.356	-1.02	2.834
in-line lunge	-1.339	0.881	-1.52	0.129	-3.065	0.387
Active leg rise up	1.068	0.805	1.327	0.184	-0.509	2.646
stability	-2.059	1.167	-1.764	0.078	-4.345	0.228
rotational stability	0.788	0.998	0.79	0.43	-1.167	2.744
Asymmetries	-0.46	0.588	-0.783	0.433	-1.613	0.692
difference between anterior R and L	0.941	0.519	1.811	0.07	-0.077	1.958
difference between posterolateral R and L	0.596	0.537	1.109	0.268	-0.457	1.648
difference between posteromedial R and L	-0.743	0.597	-1.245	0.213	-1.913	0.427
Normalized composite YBT R	-3.112	3.407	-0.914	0.361	-9.791	3.566
Normalized Composite YBT L	5.355	3.906	1.371	0.17	-2.301	13.01
differencees between composite YBT R and L	0.131	0.604	0.217	0.828	-1.053	1.315
Normalized score [% leg length] Anterior R	0.206	0.972	0.212	0.832	-1.7	2.112
Normalized score [% leg length] Anterior L	-0.794	1.122	-0.708	0.479	-2.994	1.405
Normalized score [% leg length] Posterolateral R	-0.349	1.939	-0.18	0.857	-4.15	3.452
Normalized score [% leg length] Posterolateral L	0.312	1.953	0.16	0.873	-3.515	4.14
Normalized score [% leg length] Posteromedial R	1.639	1.686	0.972	0.331	-1.665	4.943
Normalized score [% leg length] Posteromedial L	-4.216	2.314	-1.822	0.068	-8.752	0.319
Time 30m backward
Variable	Coefficient	Std. Error	z-value	p-value	95% CI (Lower)	95% CI (Upper)
const	-5.567	5.209	-1.069	0.285	-15.777	4.644
Deep squat	-3.124	2.455	-1.272	0.203	-7.937	1.690
Hurdle step	-1.678	1.709	-0.982	0.326	-5.027	1.672
in-line lunge	-3.156	2.024	-1.560	0.119	-7.124	1.188
Shoulder mobility	-1.076	1.013	-1.062	0.288	-3.062	0.910
Active leg rise up	-1.047	1.593	-0.657	0.511	-4.168	2.074
Stability	-4.117	2.897	-1.421	0.155	-9.796	1.562
Rotational stability	-0.634	1.529	-0.415	0.678	-3.631	2.363
Total FMS points	1.732	1.432	1.210	0.226	-1.076	4.540
Asymmetries	-0.158	0.722	-0.218	0.827	-1.574	1.259
Difference between anterior R and L	0.672	0.591	1.138	0.255	-0.487	1.830
Difference between posterolateral R and L	0.138	0.618	0.224	0.823	-1.073	1.349
Difference between posteromedial R and L	1.317	0.895	1.471	0.141	-0.437	3.071
Normalized composite YBT R	-1.785	3.225	-0.553	0.581	-8.106	4.536
Normalized Composite YBT L	2.546	3.619	0.704	0.481	-4.567	9.659
Differences between composite YBT R and L	-0.671	0.857	-0.783	0.434	-2.352	1.009
Normalized score [% leg length] Anterior R	0.287	1.053	0.273	0.785	-1.777	2.352
Normalized score [% leg length] Anterior L	-0.772	1.197	-0.645	0.519	-3.120	1.576
Normalized score [% leg length] Posterolateral R	-2.189	2.476	-0.884	0.377	-6.978	2.600
Normalized score [% leg length] Posterolateral L	0.938	2.429	0.386	0.699	-3.822	5.699
Normalized score [% leg length] Posteromedial R	0.883	2.019	0.437	0.662	-3.074	4.839
Normalized score [% leg length] Posteromedial L	-2.658	2.506	-1.061	0.289	-7.570	2.255
